# Supplementary material for: Activation of the endocytosis pathway stratifies subtypes and therapeutic sensitivity in colorectal cancer
Source: Research Square preprint supplement (doi:10.21203/rs.3.rs-10164107/v1), 2026-07-05
Supplement: Supplementary file 1 [file 11a2656584e684c4e095cd2a.docx]

**Table S2. Frequency of mutations and copy number alterations in 17 endocytosis-related genes (Caris MI TumorSeek Panel)**

| Gene | Mutation | Amplification |
| --- | --- | --- |
| *ARFRP1* | 0% | 1.03% |
| *SH3GL1* | 0% | 0.29% |
| *MDM2* | 0% | 0.08% |
| *PICALM* | 0% | 0.03% |
| *CLTCL1* | 0% | 0.02% |
| *COPB1* | 0% | 0.01% |
| *RABEP1* | 0% | 0.01% |
| *CLTC* | 0% | 0.01% |
| *HIP1* | 0% | 0.01% |
| *CBL* | 0% | 0.01% |
| *CBLC* | 0% | 0% |
| *CBLB* | 0% | 0% |
| *DNM2* | 0% | 0% |
| *EPS15* | 0% | 0% |
| *FNBP1* | 0% | 0% |
| *NDRG1* | 0% | 0% |
| *VTI1A* | 0% | 0% |
