# Supplementary material for: Activation of the endocytosis pathway stratifies subtypes and therapeutic sensitivity in colorectal cancer
Source: Research Square preprint supplement (doi:10.21203/rs.3.rs-10164107/v1), 2026-07-05
Supplement: Supplementary file 3 [file 49bfca42d90120cf140c57f7.pdf]

Figure S3

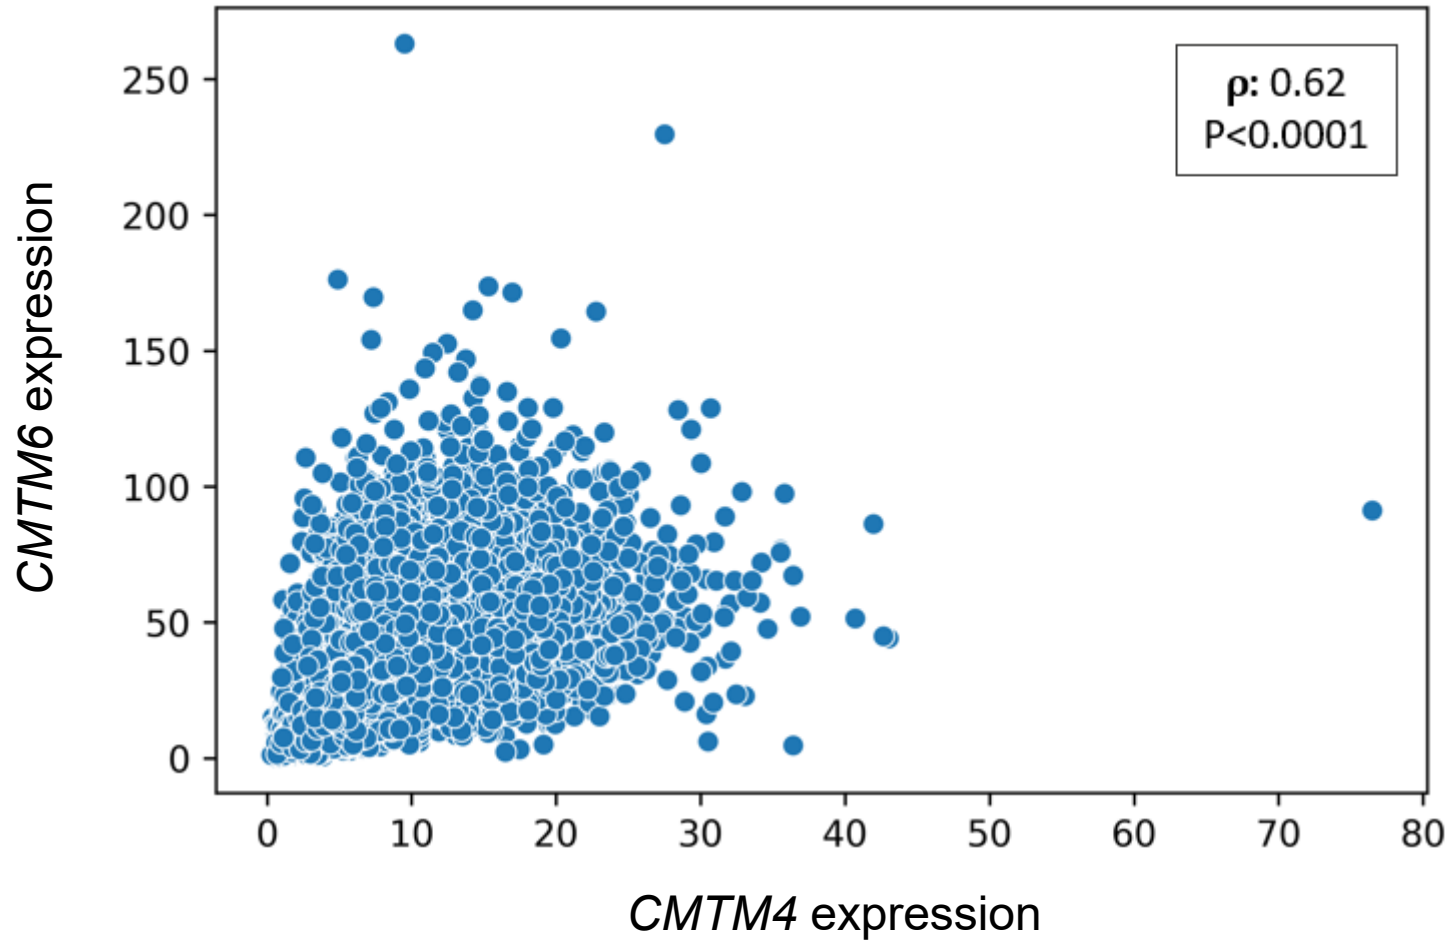

CMTM4 and CMTM6 are known to regulate PD-L1 recycling by preventing its lysosomal degradation, thereby sustaining PD-L1 surface expression. A strong positive correlation was observed between their transcript levels, suggesting coordinated regulation of this immune checkpoint-related axis.
