# Supplementary material for: Activation of the endocytosis pathway stratifies subtypes and therapeutic sensitivity in colorectal cancer
Source: Research Square preprint supplement (doi:10.21203/rs.3.rs-10164107/v1), 2026-07-05
Supplement: Supplementary file 5 [file 5ae7178613defc00728bd9a5.pdf]

**Figure S4**

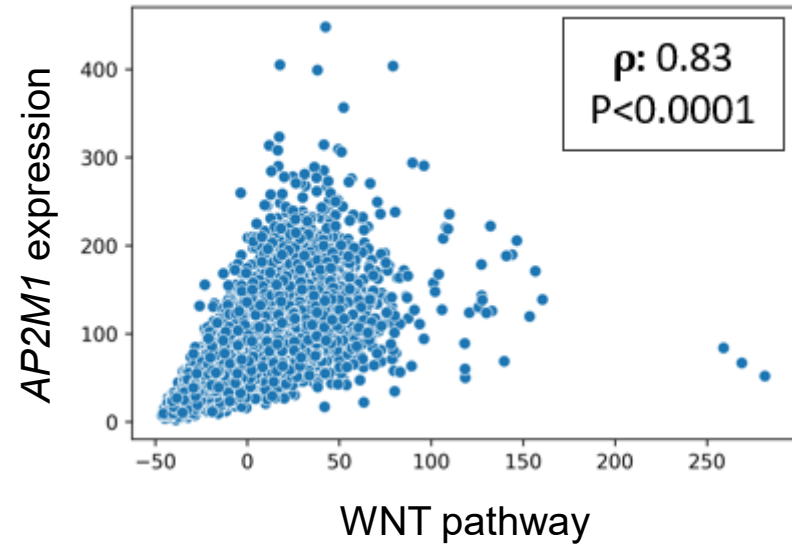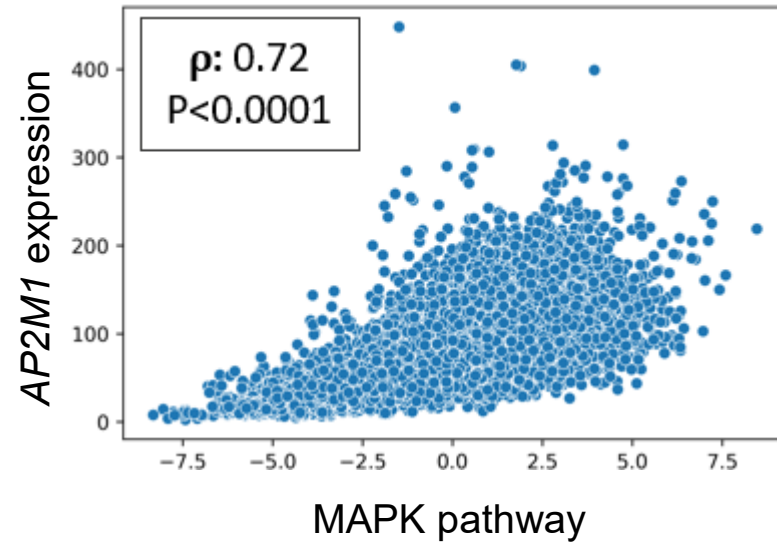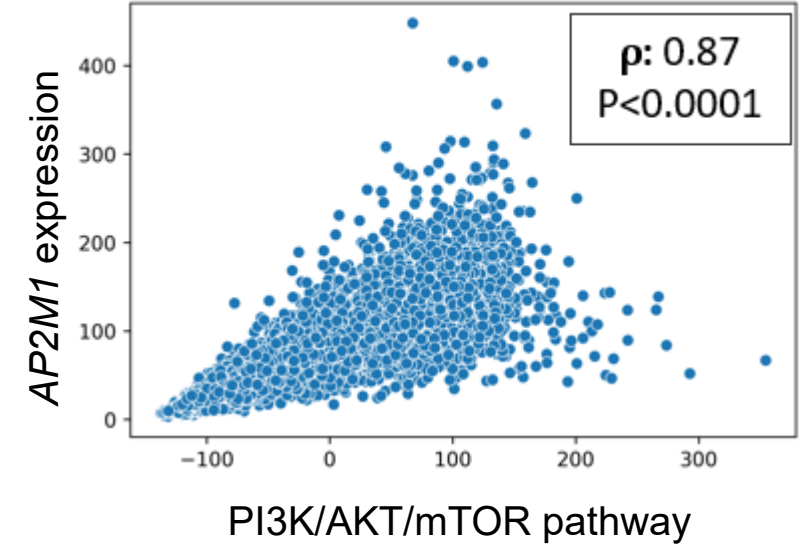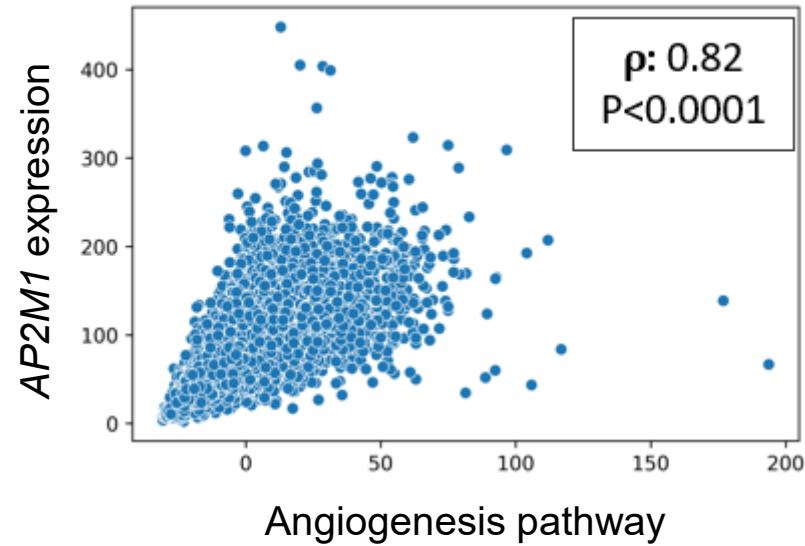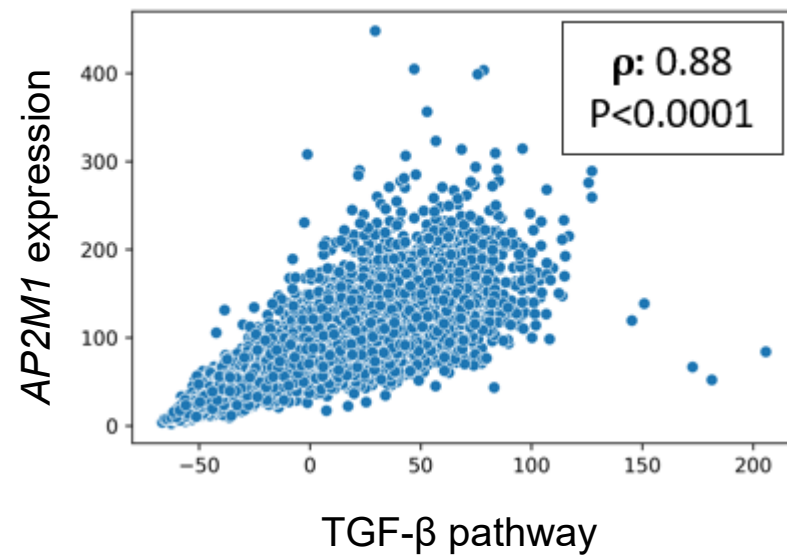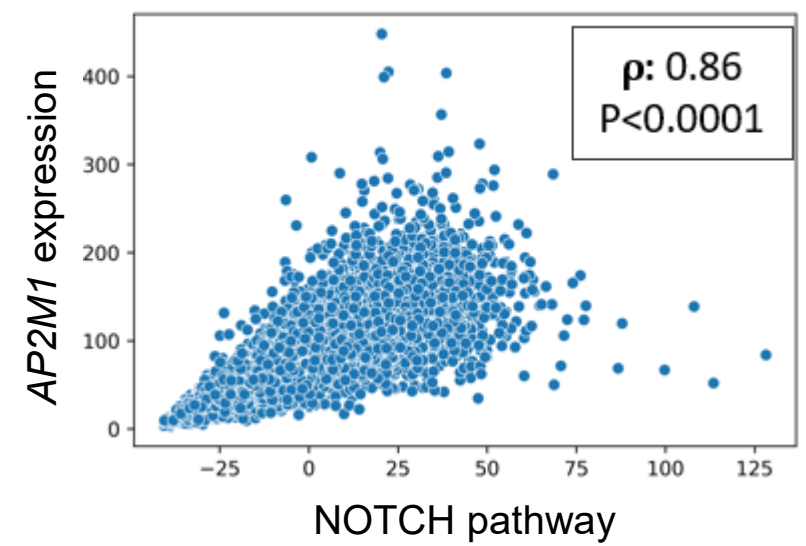

The relationship between *AP2M1* expression and oncogenic signaling pathway activity was analyzed using the Caris cohort. *AP2M1* expression showed strong positive correlations with six oncogenic pathway signatures.
