# Supplementary material for: Activation of the endocytosis pathway stratifies subtypes and therapeutic sensitivity in colorectal cancer
Source: Research Square preprint supplement (doi:10.21203/rs.3.rs-10164107/v1), 2026-07-05
Supplement: Supplementary file 10 [file 9a6752dbcc6c2a2d989df4e2.pdf]

Figure S5

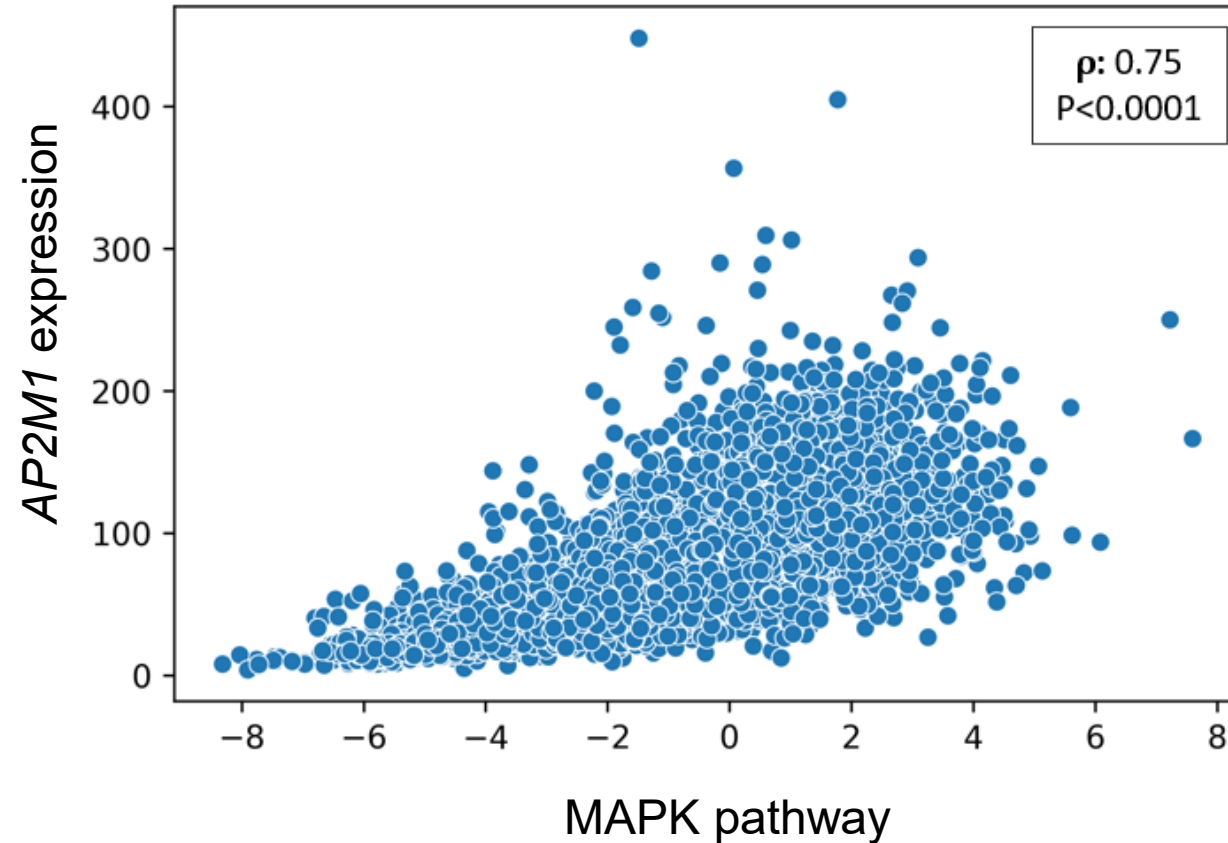

We analyzed the association between *AP2M1* expression and oncogenic signaling pathway activity in *RAS/BRAF* wild-type cases within the Caris cohort. The results were consistent with those observed in the overall cohort, showing strong correlations with multiple signaling pathways. Representative findings for the MAPK pathway are shown in the figure.
