# Supplementary figures and images for: Activation of the endocytosis pathway stratifies subtypes and therapeutic sensitivity in colorectal cancer
Source: Research Square preprint supplement (doi:10.21203/rs.3.rs-10164107/v1), 2026-07-05

Figure S2

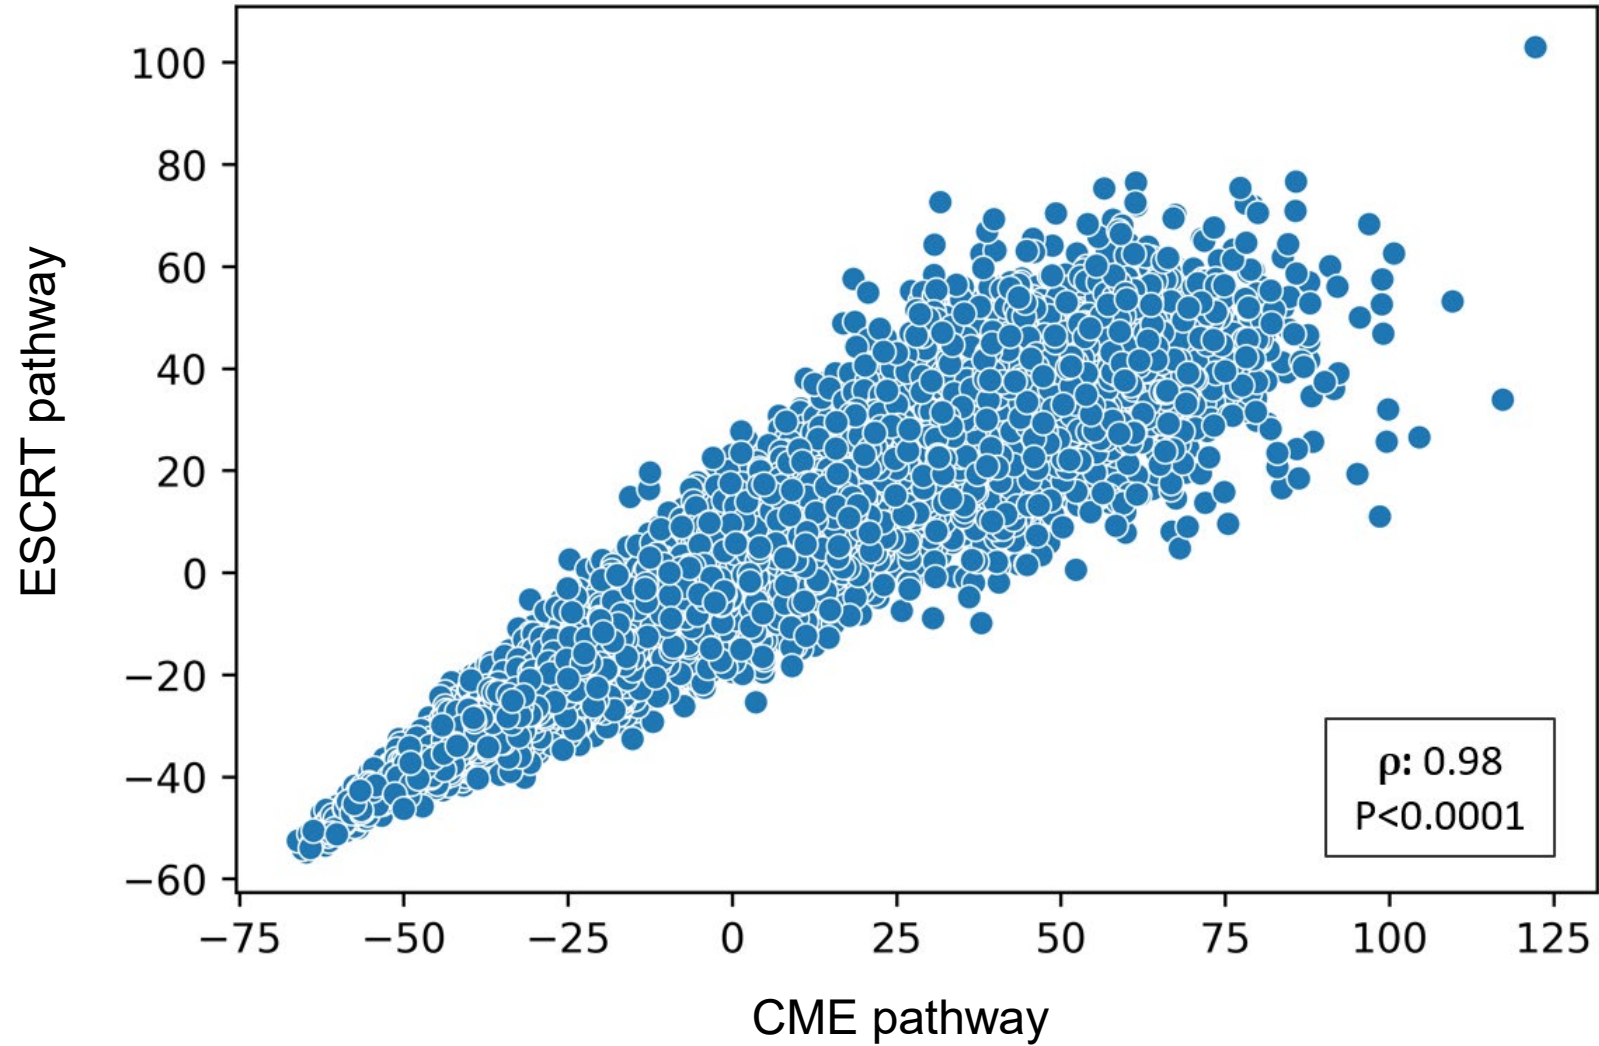

Z-scores of the CME and ESCRT pathways showed a strong positive correlation.

Supplement: Supplementary file 4 [file 4dbb44eff3dbbf1251de28e8.pdf]
